# Supplementary material
Source: PubMed Central journal article supplement (PMC3075944)
Supplement: NIHMS226333-supplement-supplementary_methods.pdf [file NIHMS226333-supplement-supplementary_methods.pdf]

## Supplementary Methods

### Preparation of membrane and soluble fractions from brain, and western blotting.

Membrane and soluble fractions from brains were prepared as described<sup>1</sup> with the following modifications: briefly, brains from E14 and E18 and cortices from adult Sprague-Dawley rats were homogenized using a Teflon homogenizer in 5 ml ice-cold buffer (320 mM sucrose, 10 mM Tris-HCl, pH 7.4, 5 mM EDTA, 1:100 Protease Inhibitor Cocktail (Sigma)) per 1 g of tissue. The homogenates were centrifuged at 700g for 10 min at 4 °C, followed by centrifugation of the supernatant at 28,000g for 16 min at 4 °C. The high-speed pellet was resuspended in 500  $\mu$ l ice-cold TE buffer (10 mM Tris-HCl, 5 mM EDTA, pH 7.4). Samples containing 20–40  $\mu$ g protein were diluted 1:1 in loading buffer<sup>2</sup>, boiled for 5 min, then separated on 16.5% Tris-Tricine gels<sup>3</sup>. Before antibody staining, the blot was incubated for 2 min with Ponceau S solution (Sigma) to determine protein content as a loading control.

**Hoechst staining and caspase 3 immunocytochemistry.** Fixed cells were incubated for 10 min with Hoechst 33342 (1:1,000 in PBS, Sigma), rinsed three times in PBS and mounted onto slides with Fluoromount G (Southern Biotechnology). For immunocytochemistry, fixed cells were washed with PBS for 5 min and then permeabilized with 0.3% Triton X-100 for 5 min at 4 °C. Neurons were washed again with PBS, incubated with blocking solution (10% goat serum, 0.1% Triton X-100 in PBS) for 1 h at 4 °C and then incubated with an antibody to cleaved caspase 3 (1:100, Cell Signaling Technology) in blocking solution overnight at 4 °C. After rinsing three times with PBS, an anti-rabbit secondary antibody coupled to rhodamine (1:500, Jackson ImmunoResearch) was added for 1 h at approximately 25 °C. Chromatin staining with Hoechst was done simultaneously with the last antibody wash, and neurons were rinsed and mounted as described above.

**Immunocytochemistry of neural progenitor cultures.** For immunocytochemistry, cells were fixed for 20 min with 4% paraformaldehyde. Cultures were then washed with PBS, permeabilized for 5 min in 0.3% Triton X-100 in PBS and then blocked for 1 h with buffer containing 10% goat serum and 0.3% Triton X-100. Cells were then incubated at 4 °C overnight with primary antibodies in 0.1% Triton X-100 in PBS containing 10% goat serum. After three washes with 0.1% Triton X-100 in PBS, cells were incubated at room temperature for 60 min with Alexa-555-conjugated goat anti-mouse (1:2,000, Molecular Probes) and Alexa-647-conjugated anti-rabbit (1:2,000, Molecular Probes) secondary antibodies prepared in 0.1% Triton X-100 PBS containing 10% goat serum. Finally, samples were washed three times with PBS and counterstained for 10 min with Hoechst 33258. Fluorescent images were imported into Spot 3.5 (Diagnostic Instruments) with a Diagnostic Instruments Spot2 digital camera mounted on a Nikon Eclipse E600 using a 20 $\times$ /0.75 Plan Apo objective (Nikon).

1. Kim, J.H., Liao, D., Lau, L.-F. & Huganir, R.L. SynGAP: a synaptic rasGAP that associates with the PSD-95/SAP90 protein family. *Neuron* **20**, 683–691 (1998).
2. Laemmli, U.K. Cleavage of structural proteins during the assembly of the head of bacteriophage T4. *Nature* **227**, 680–685 (1970).
3. Schagger, H. & von Jagow, G. Tricine-sodium dodecyl sulfate-polyacrylamide gel electrophoresis for the separation of proteins in the range from 1 to 100 kDa. *Anal. Biochem.* **166**, 368–379 (1987).
